# Supplementary material for: Noble gas encapsulation: clathrate hydrates and their HF doped analogues
Source: Royal Society of Chemistry journal article supplement (doi:10.1039/c4cp02062f), 2014-01-01
Supplement: c4cp02062f1.pdf [file c4cp02062f1.pdf]

## Noble Gas Encapsulation: Clathrate Hydrates and their HF Doped Analogues

Sukanta Mondal and Pratim Kumar Chattaraj\*

*Department of Chemistry and Center for Theoretical Studies, Indian Institute of Technology,  
Kharagpur, 721302, India.*

*\*To whom correspondence should be addressed. E-mail: [pkc@chem.iitkgp.ernet.in](mailto:pkc@chem.iitkgp.ernet.in),  
Telephone: +91-3222-283304, Fax: +91-3222-255303.*

### Supporting Information

**Table S1.** Hardness ( $\eta$ , eV) and electrophilicity ( $\omega$ , eV) values calculated at  $\omega$ B97X-D/6-311+G(d,p) level of theory for the nNg@5<sup>12</sup> and nNg@HF5<sup>12</sup> systems.

| Systems             | $\eta$ | $\omega$ | Systems               | $\eta$ | $\omega$ |
|---------------------|--------|----------|-----------------------|--------|----------|
| 5 <sup>12</sup>     | 12.020 | 0.759    | HF5 <sup>12</sup>     | 12.067 | 0.798    |
| 1He@5 <sup>12</sup> | 12.173 | 0.724    | 1He@HF5 <sup>12</sup> | 12.220 | 0.761    |
| 2He@5 <sup>12</sup> | 12.242 | 0.717    | 2He@HF5 <sup>12</sup> | 12.303 | 0.746    |
| 3He@5 <sup>12</sup> | 12.323 | 0.694    | 3He@HF5 <sup>12</sup> | 12.371 | 0.729    |
| 4He@5 <sup>12</sup> | 12.361 | 0.693    | 4He@HF5 <sup>12</sup> | 12.407 | 0.729    |
| 5He@5 <sup>12</sup> | 12.374 | 0.697    | 5He@HF5 <sup>12</sup> | 12.436 | 0.723    |
| 1Ne@5 <sup>12</sup> | 12.113 | 0.738    | 1Ne@HF5 <sup>12</sup> | 12.160 | 0.776    |
| 2Ne@5 <sup>12</sup> | 12.163 | 0.745    | 2Ne@HF5 <sup>12</sup> | 12.234 | 0.772    |
| 3Ne@5 <sup>12</sup> | 12.227 | 0.725    | 3Ne@HF5 <sup>12</sup> | 12.279 | 0.761    |
| 1Ar@5 <sup>12</sup> | 12.107 | 0.743    | 1Ar@HF5 <sup>12</sup> | 12.160 | 0.778    |
| 2Ar@5 <sup>12</sup> | 12.242 | 0.753    | 2Ar@HF5 <sup>12</sup> | 12.245 | 0.786    |

**Table S2.** Hardness ( $\eta$ , eV) and electrophilicity ( $\omega$ , eV) values calculated at  $\omega$ B97X-D/6-311+G(d,p) level of theory for the nNg@51268 and nNg@HF51268 systems.

| <b>Systems</b>         | <b><math>\eta</math></b> | <b><math>\omega</math></b> | <b>Systems</b>           | <b><math>\eta</math></b> | <b><math>\omega</math></b> |
|------------------------|--------------------------|----------------------------|--------------------------|--------------------------|----------------------------|
| 5 <sup>1268</sup>      | 11.872                   | 0.733                      | HF5 <sup>1268</sup>      | 11.887                   | 0.747                      |
| 1He@5 <sup>1268</sup>  | 11.890                   | 0.728                      | 1He@HF5 <sup>1268</sup>  | 11.903                   | 0.744                      |
| 2He@5 <sup>1268</sup>  | 11.929                   | 0.720                      | 2He@HF5 <sup>1268</sup>  | 11.944                   | 0.734                      |
| 3He@5 <sup>1268</sup>  | 11.922                   | 0.721                      | 3He@HF5 <sup>1268</sup>  | 11.936                   | 0.736                      |
| 4He@5 <sup>1268</sup>  | 11.974                   | 0.710                      | 4He@HF5 <sup>1268</sup>  | 11.981                   | 0.726                      |
| 5He@5 <sup>1268</sup>  | 11.990                   | 0.707                      | 5He@HF5 <sup>1268</sup>  | 12.007                   | 0.721                      |
| 6He@5 <sup>1268</sup>  | 12.006                   | 0.703                      | 6He@HF5 <sup>1268</sup>  | 12.022                   | 0.716                      |
| 7He@5 <sup>1268</sup>  | 12.026                   | 0.702                      | 7He@HF5 <sup>1268</sup>  | 12.067                   | 0.707                      |
| 8He@5 <sup>1268</sup>  | 12.042                   | 0.702                      | 8He@HF5 <sup>1268</sup>  | 12.061                   | 0.716                      |
| 9He@5 <sup>1268</sup>  | 12.084                   | 0.696                      | 9He@HF5 <sup>1268</sup>  | 12.108                   | 0.708                      |
| 10He@5 <sup>1268</sup> | -                        | -                          | 10He@HF5 <sup>1268</sup> | 12.132                   | 0.698                      |
| 1Ne@5 <sup>1268</sup>  | 11.853                   | 0.737                      | 1Ne@HF5 <sup>1268</sup>  | 11.877                   | 0.750                      |
| 2Ne@5 <sup>1268</sup>  | 11.855                   | 0.738                      | 2Ne@HF5 <sup>1268</sup>  | 11.867                   | 0.753                      |
| 3Ne@5 <sup>1268</sup>  | 11.852                   | 0.737                      | 3Ne@HF5 <sup>1268</sup>  | 11.871                   | 0.754                      |
| 4Ne@5 <sup>1268</sup>  | 11.888                   | 0.733                      | 4Ne@HF5 <sup>1268</sup>  | 11.893                   | 0.749                      |
| 5Ne@5 <sup>1268</sup>  | 11.900                   | 0.732                      | 5Ne@HF5 <sup>1268</sup>  | 11.916                   | 0.745                      |
| 6Ne@5 <sup>1268</sup>  | 11.920                   | 0.724                      | 6Ne@HF5 <sup>1268</sup>  | 11.933                   | 0.738                      |
| 1Ar@5 <sup>1268</sup>  | 11.744                   | 0.763                      | 1Ar@HF5 <sup>1268</sup>  | 11.792                   | 0.771                      |
| 2Ar@5 <sup>1268</sup>  | 11.798                   | 0.749                      | 2Ar@HF5 <sup>1268</sup>  | 11.822                   | 0.765                      |
| 3Ar@5 <sup>1268</sup>  | 11.840                   | 0.737                      | 3Ar@HF5 <sup>1268</sup>  | 11.851                   | 0.752                      |
| 4Ar@5 <sup>1268</sup>  | 11.887                   | 0.738                      | 4Ar@HF5 <sup>1268</sup>  | 11.901                   | 0.755                      |
| 5Ar@5 <sup>1268</sup>  | 11.924                   | 0.741                      | 5Ar@HF5 <sup>1268</sup>  | 11.938                   | 0.754                      |
| 6Ar@5 <sup>1268</sup>  | 11.938                   | 0.736                      | 6Ar@HF5 <sup>1268</sup>  | 11.953                   | 0.750                      |

**Figure S1.** Minimum energy structures of  $5^{12}$  and  $5^{12}6^8$  at  $\omega$ B97X-D/6-311+G(d,p) level of theory.

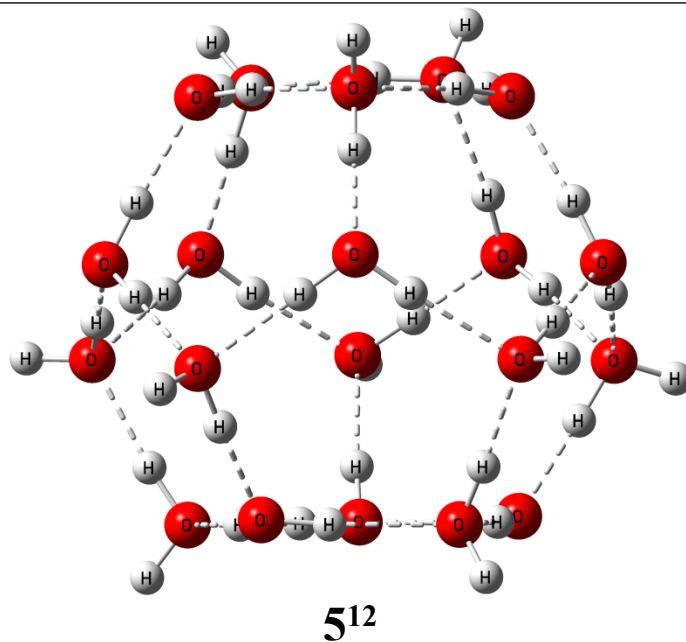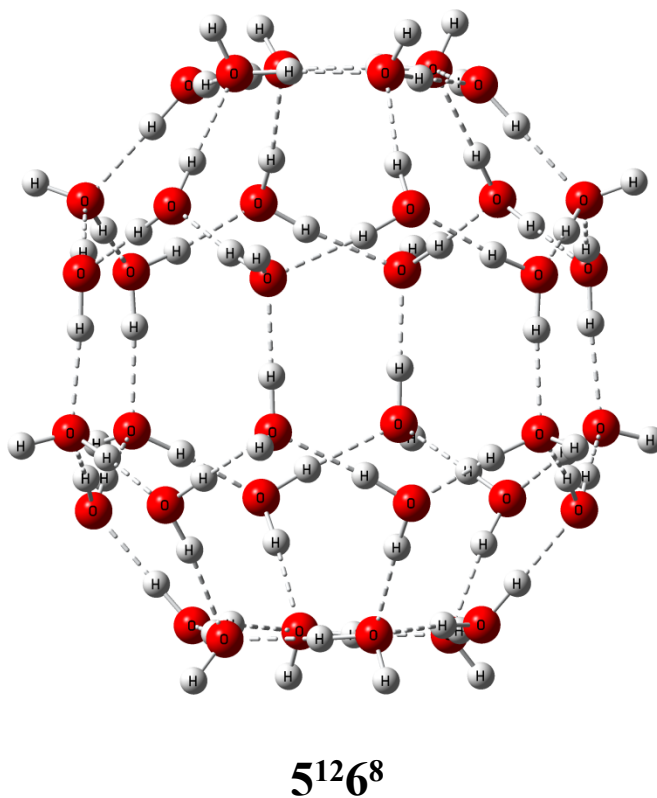

**Figure S2.** Minimum energy structures of  $n\text{Ng}@5^{12}$ ,  $n\text{Ng}@HF5^{12}$  {Ng = He (n = 1 - 5), Ne (n = 1 - 3), Ar (n = 1 - 2)} and  $n\text{Ng}@5^{12}6^8$ ,  $n\text{Ng}@HF5^{12}6^8$  {Ng = He (n = 1 - 9/10), Ne and Ar (n = 1 - 6)} at  $\omega\text{B97X-D/6-311+G(d,p)}$  level of theory.

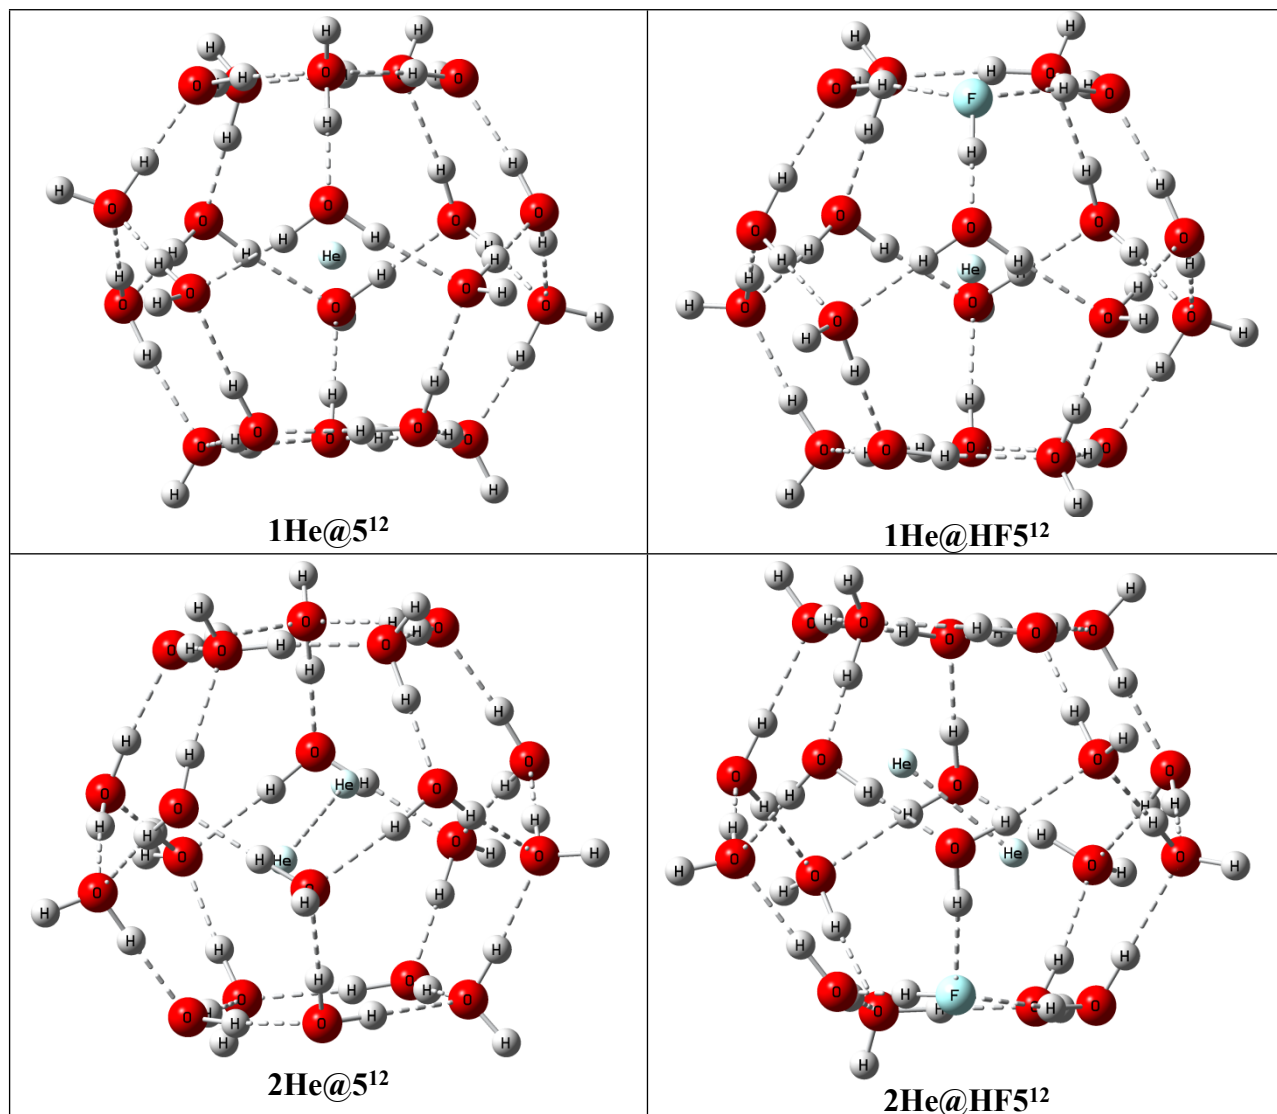

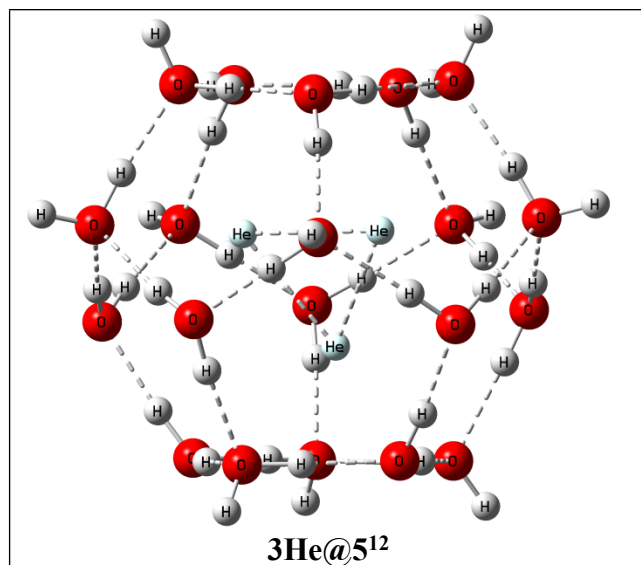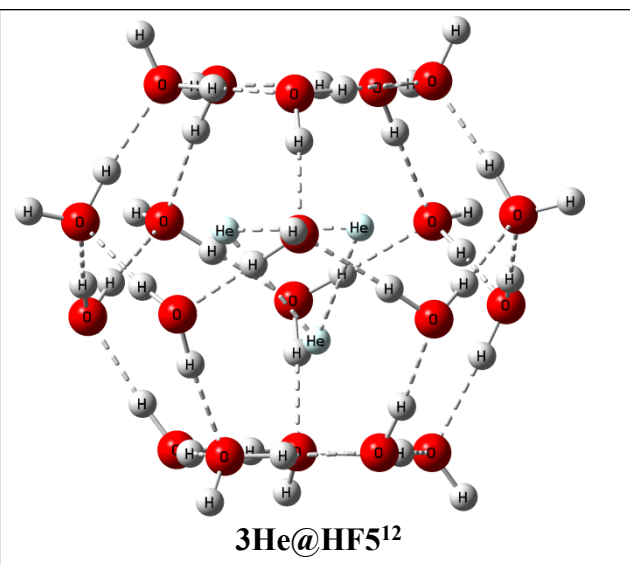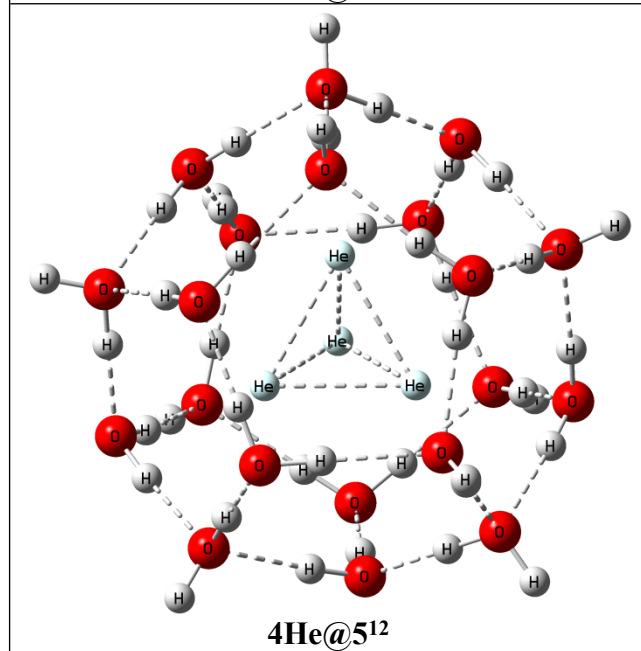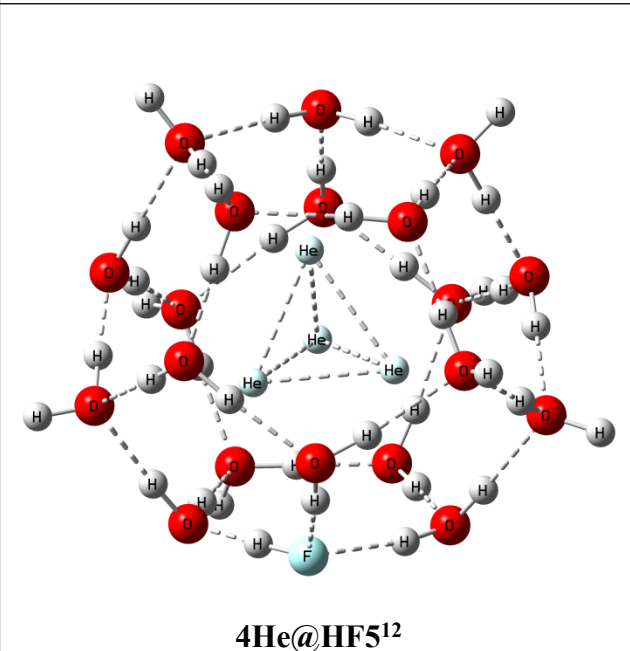

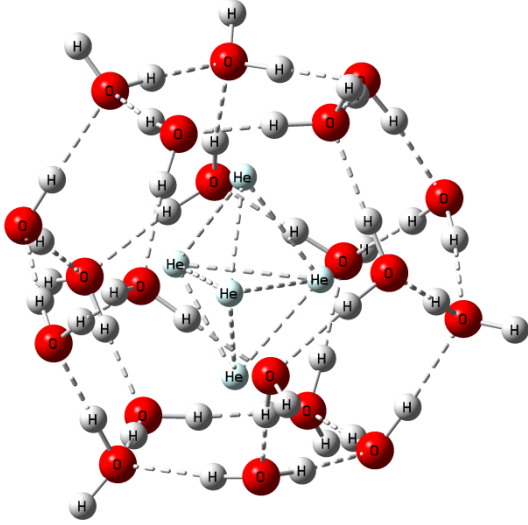

**5He@5<sup>12</sup>**

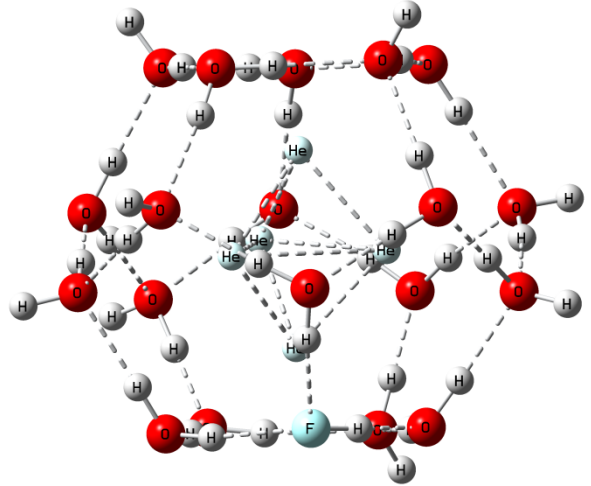

**5He@HF5<sup>12</sup>**

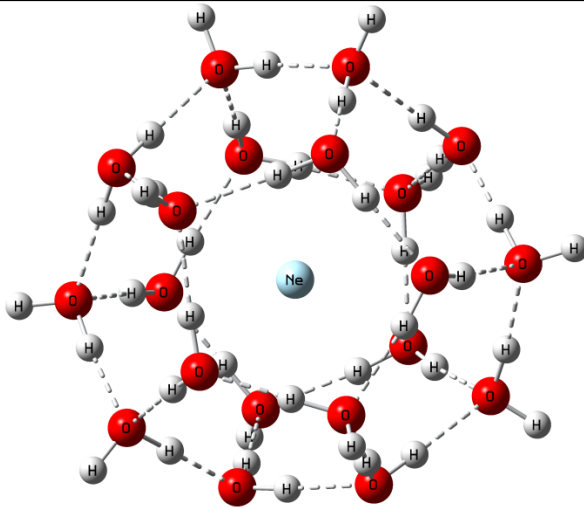

**1Ne@5<sup>12</sup>**

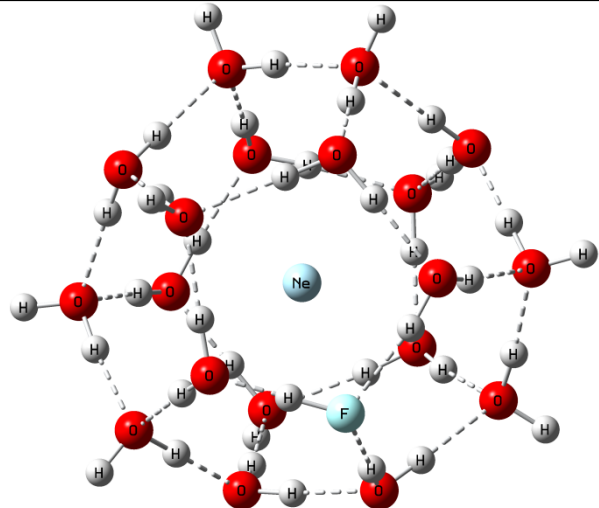

**1Ne@HF5<sup>12</sup>**

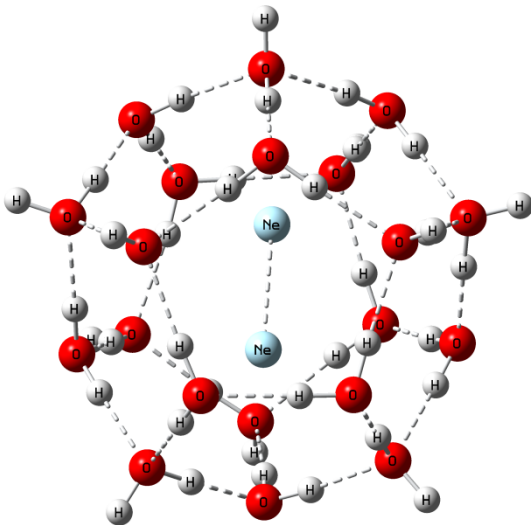

**2Ne@5<sup>12</sup>**

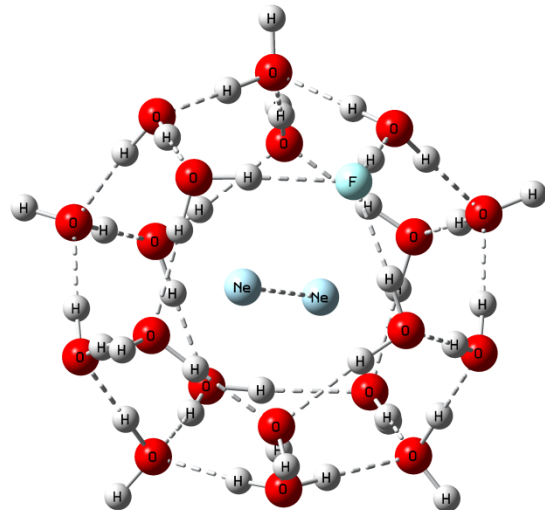

**2Ne@HF5<sup>12</sup>**

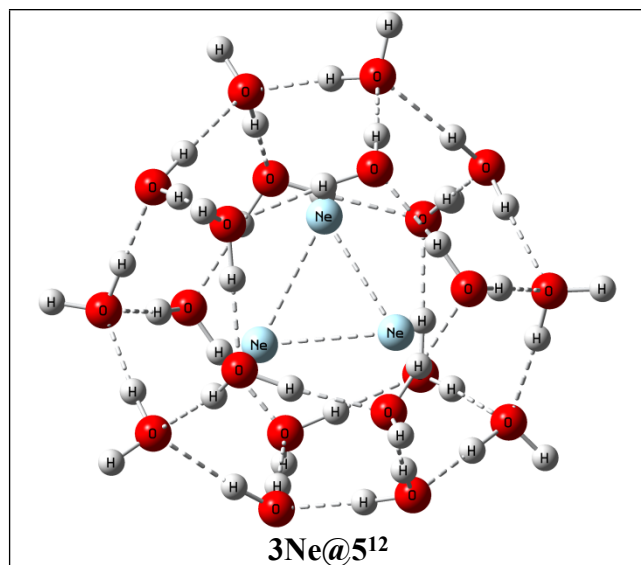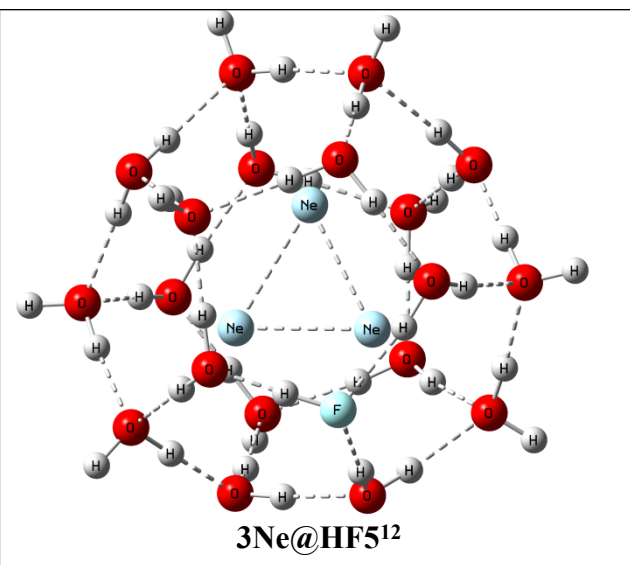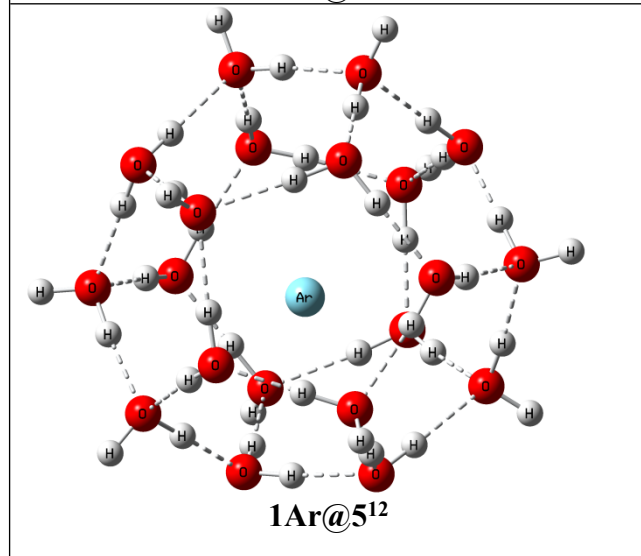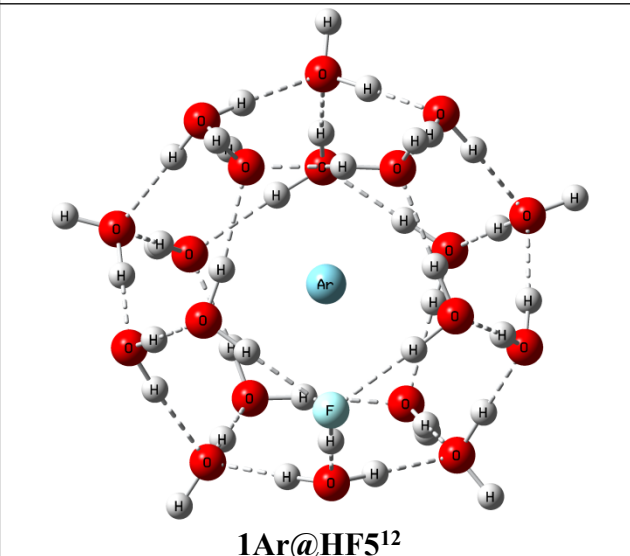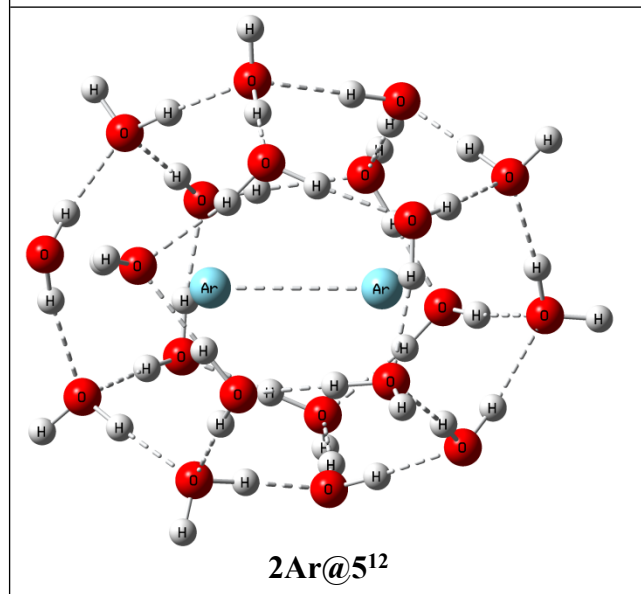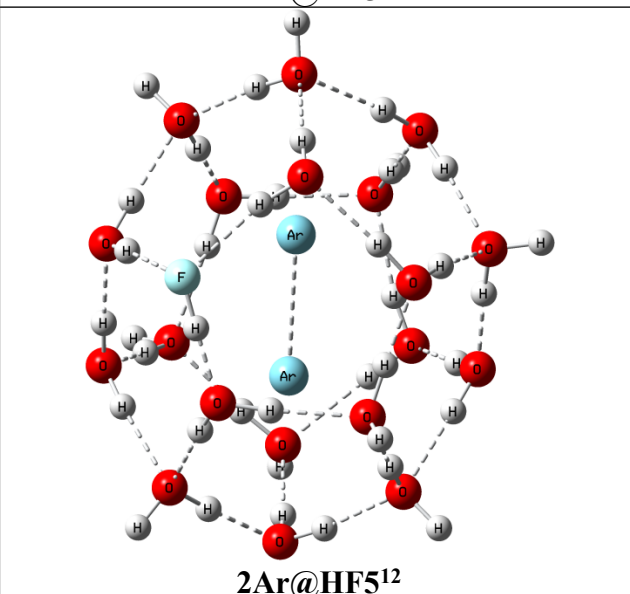

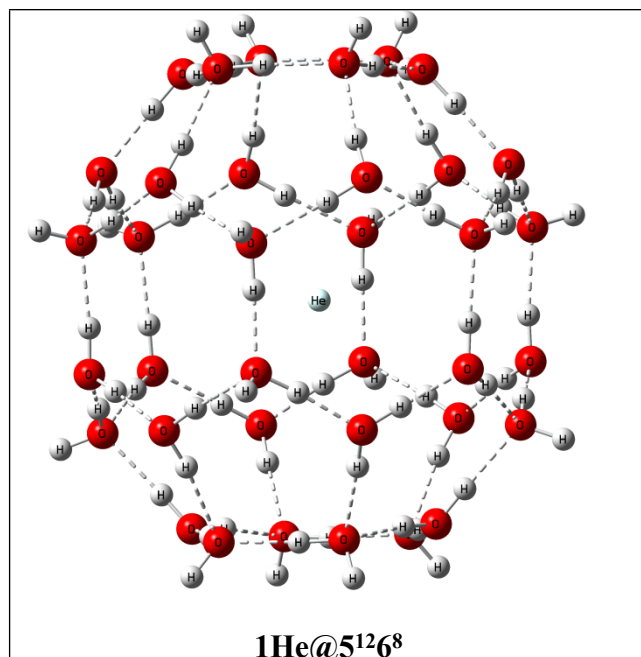

$1\text{He}@5^{12}6^8$

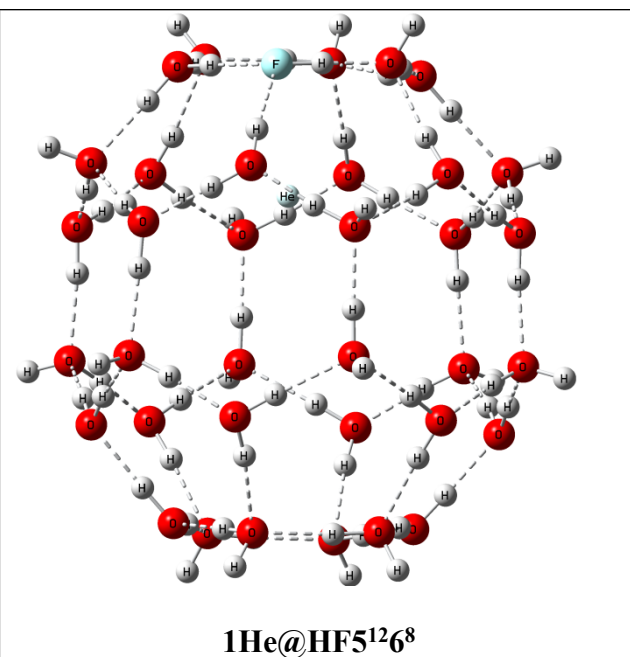

$1\text{He}@HF5^{12}6^8$

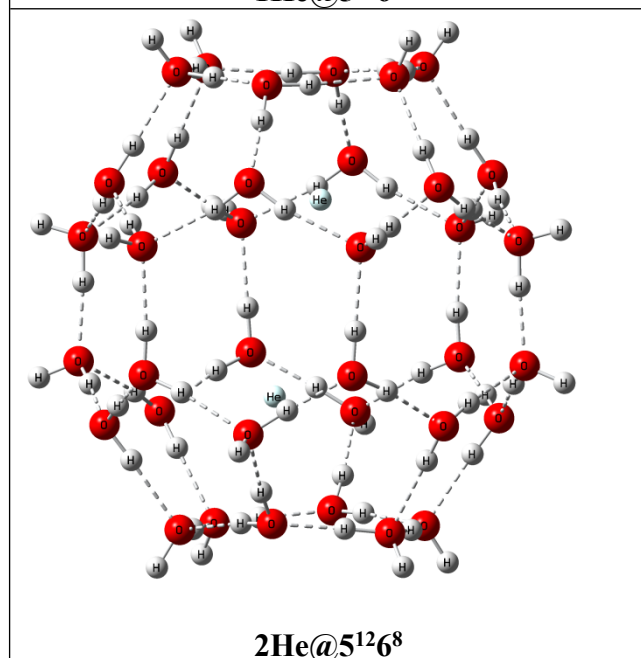

$2\text{He}@5^{12}6^8$

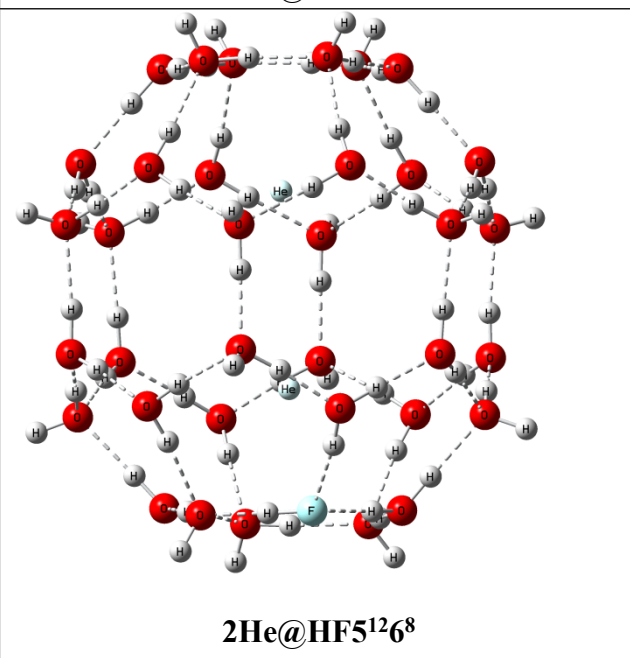

$2\text{He}@HF5^{12}6^8$



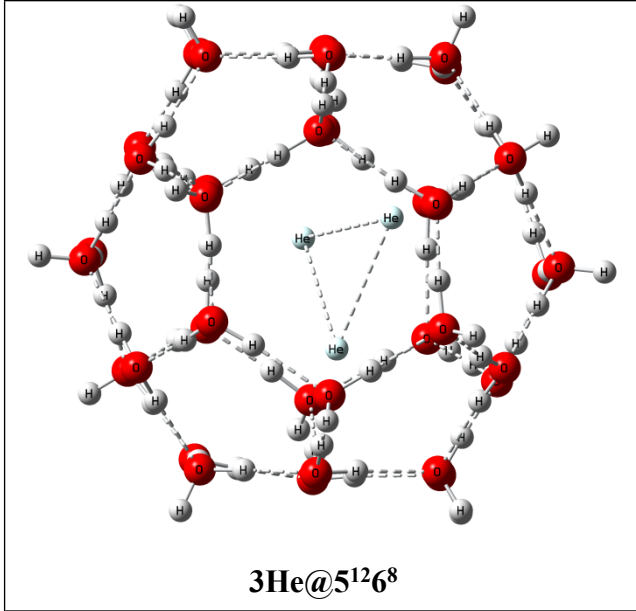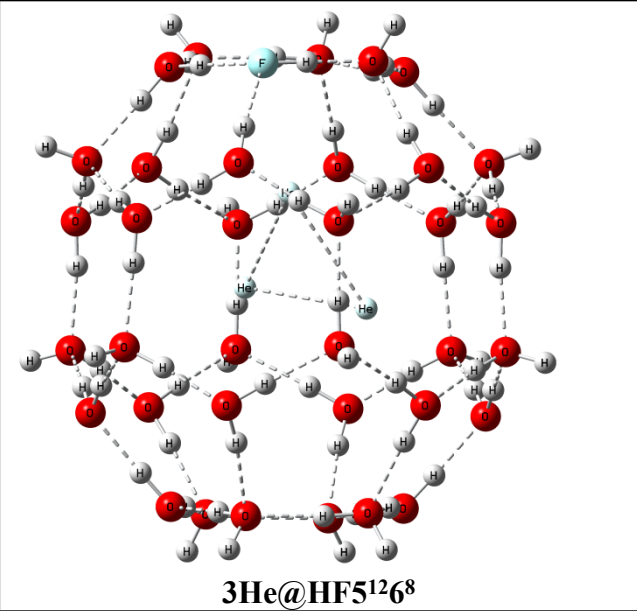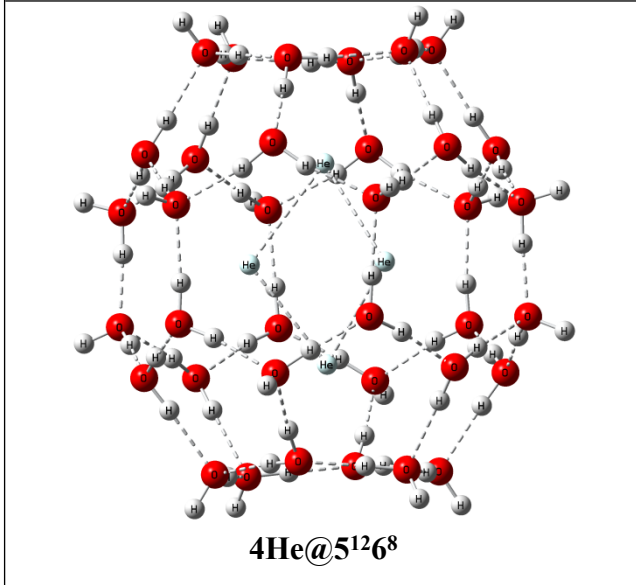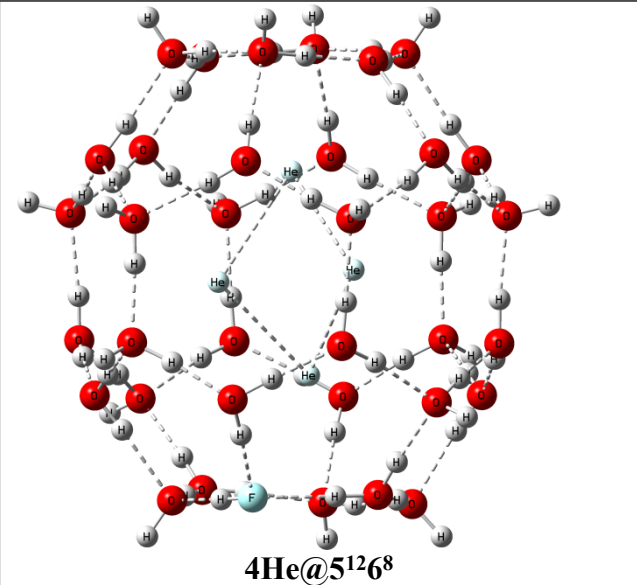

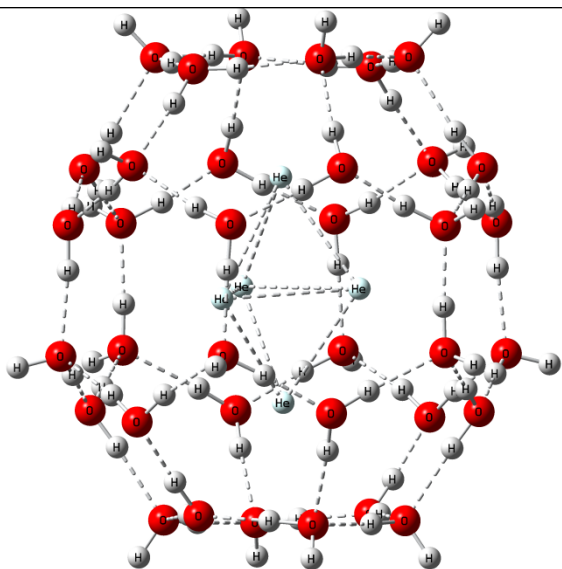

$5\text{He}@5^{126}8$

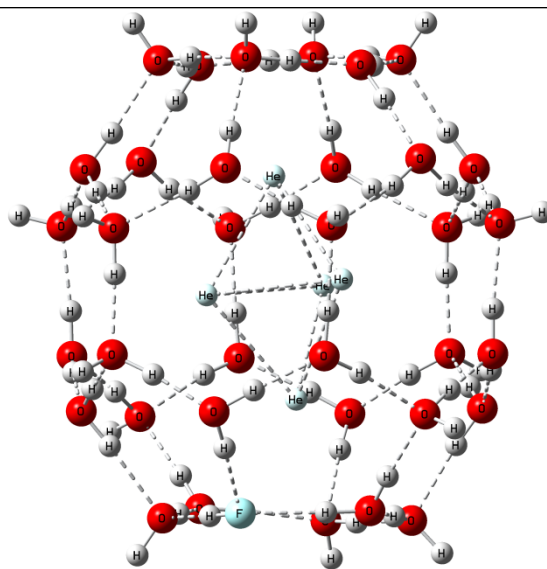

$5\text{He}@5^{126}8$

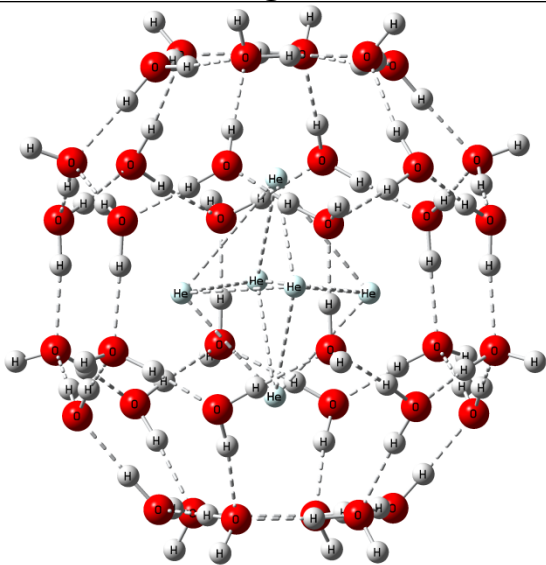

$6\text{He}@5^{126}8$

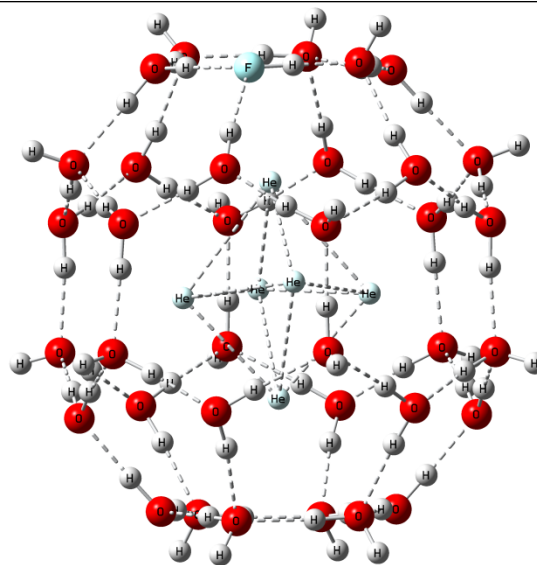

$6\text{He}@HF5^{126}8$

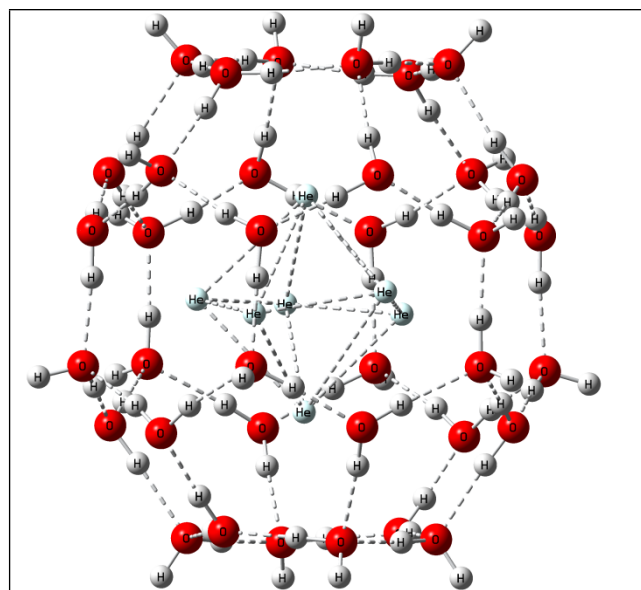

**7He@5<sup>12</sup>6<sup>8</sup>**

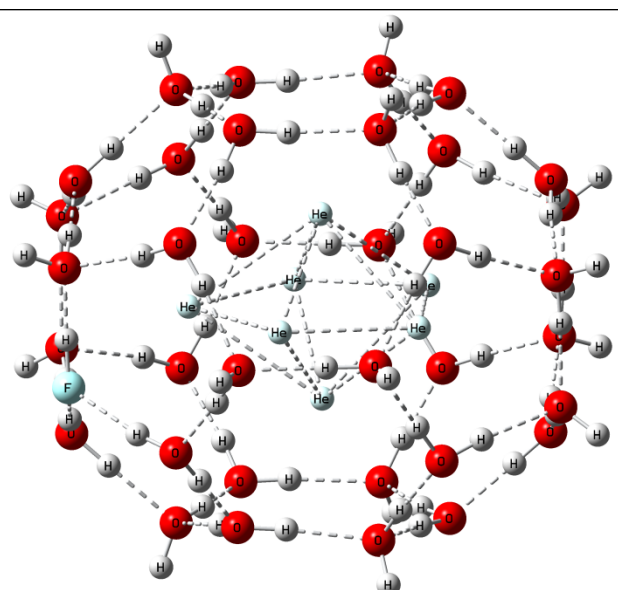

**7He@HF5<sup>12</sup>6<sup>8</sup>**

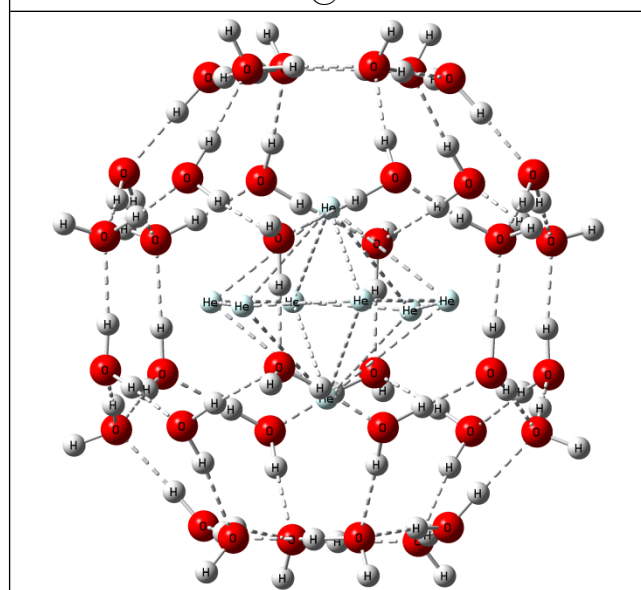

**8He@5<sup>12</sup>6<sup>8</sup>**

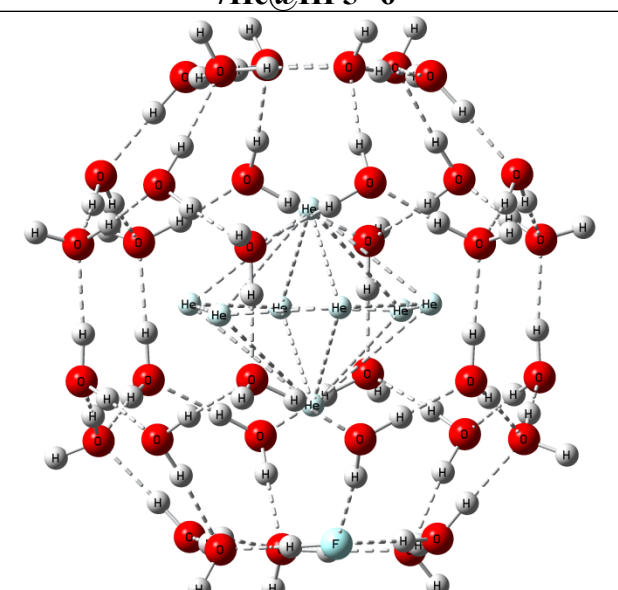

**8He@HF5<sup>12</sup>6<sup>8</sup>**

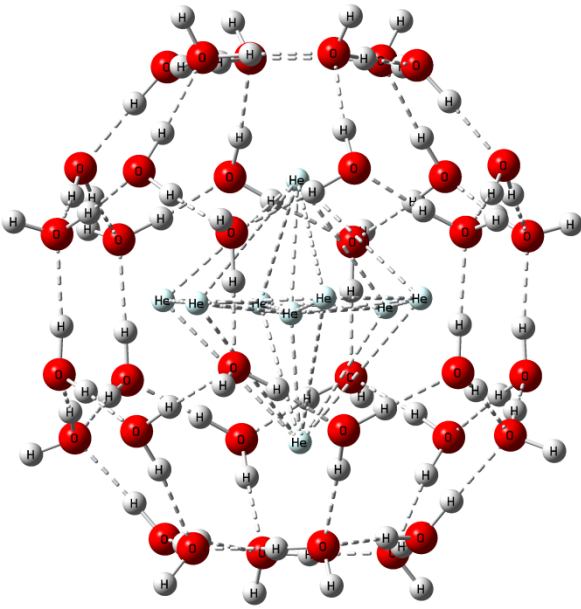

**9He@5<sup>12</sup>6<sup>8</sup>**

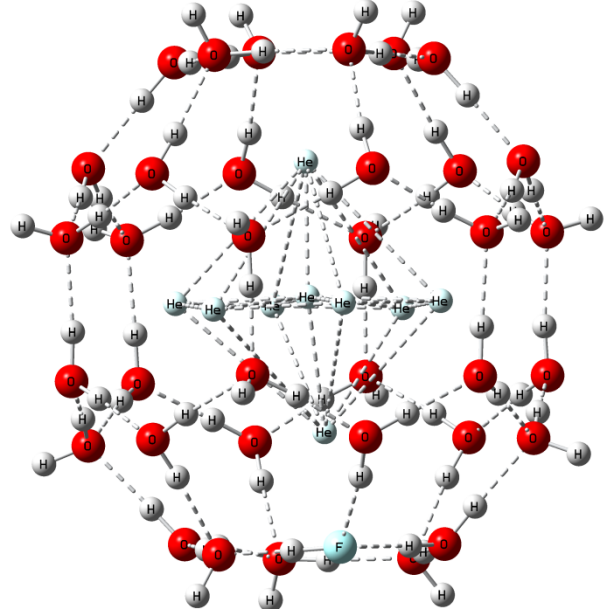

**9He@HF5<sup>12</sup>6<sup>8</sup>**

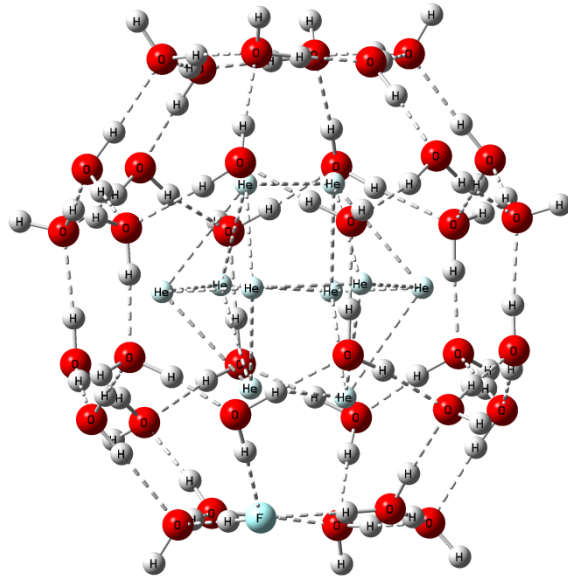

**10He@HF5<sup>12</sup>6<sup>8</sup>**

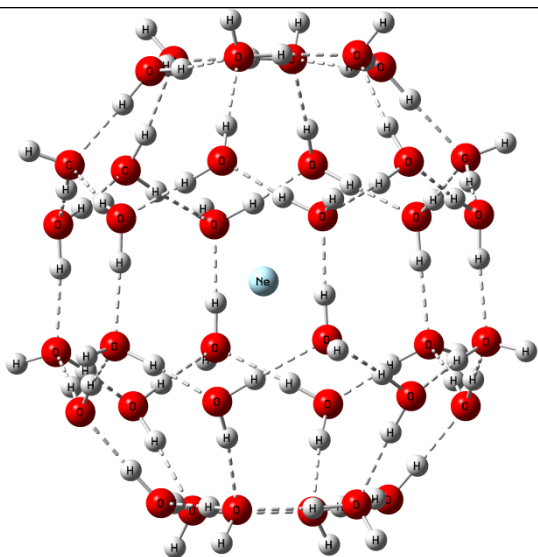

$1\text{Ne}@5^{12}6^8$

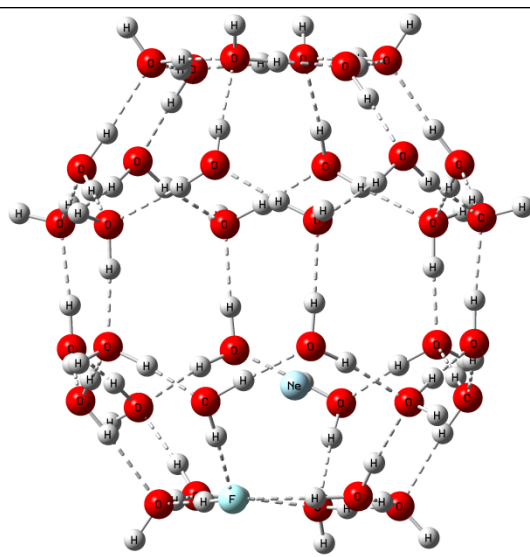

$1\text{Ne}@HF5^{12}6^8$

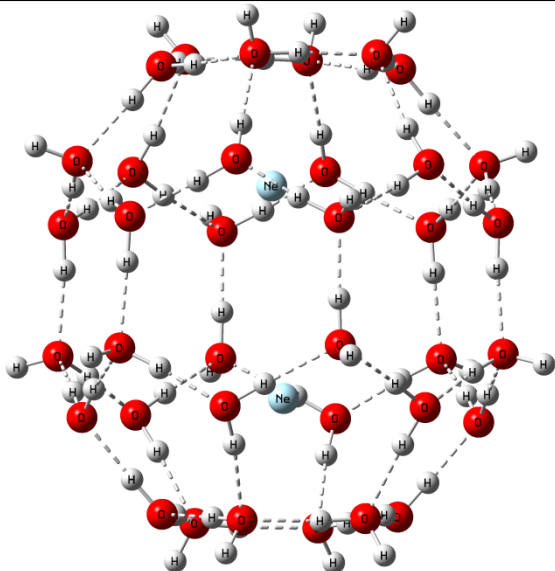

$2\text{Ne}@5^{12}6^8$

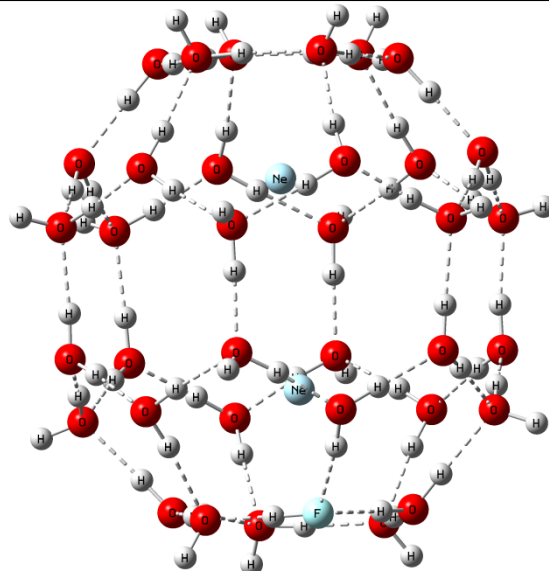

$2\text{Ne}@HF5^{12}6^8$

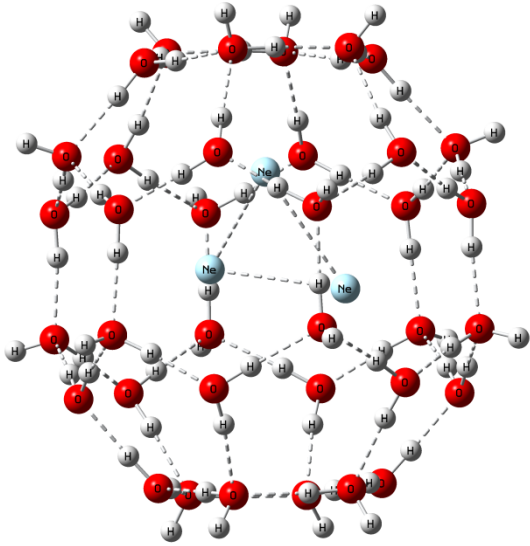

$3\text{Ne}@5^{12}6^8$

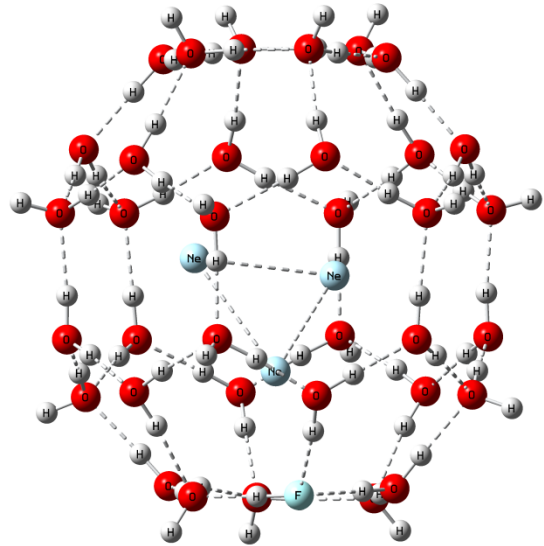

$3\text{Ne}@HF5^{12}6^8$

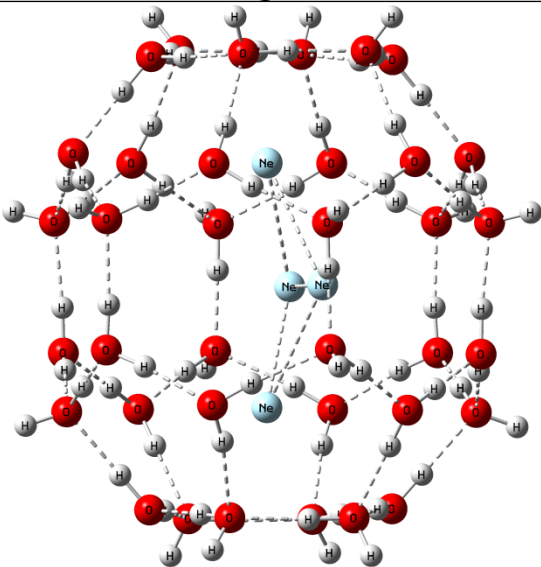

$4\text{Ne}@5^{12}6^8$

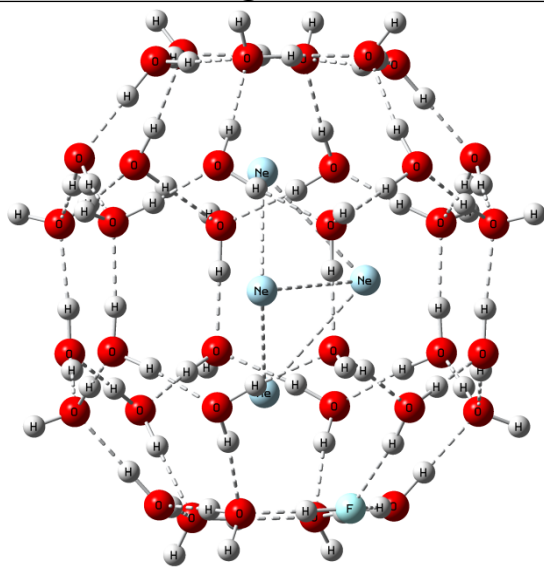

$4\text{Ne}@HF5^{12}6^8$

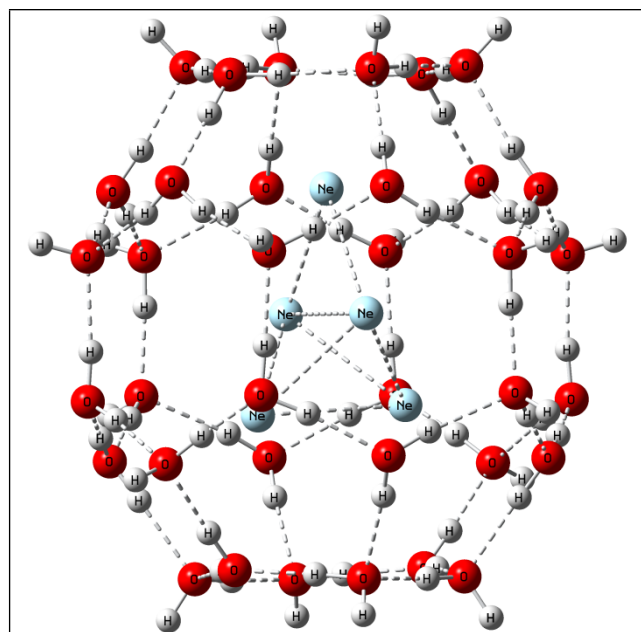

**5Ne@5<sup>12</sup>6<sup>8</sup>**

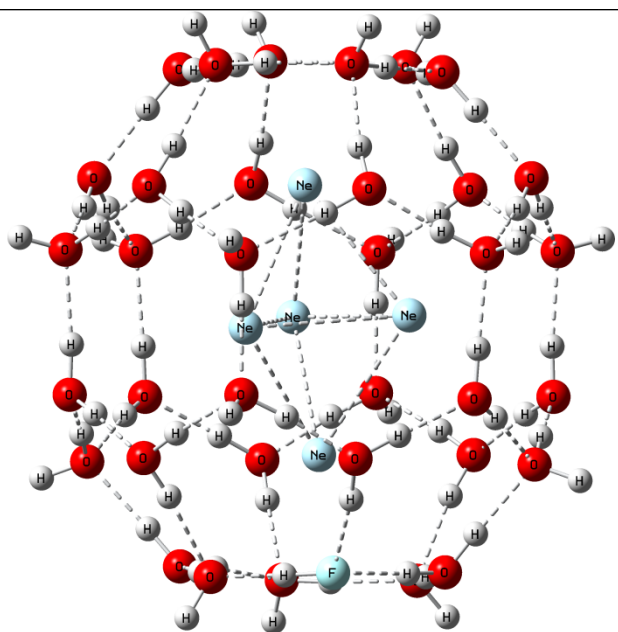

**5Ne@HF5<sup>12</sup>6<sup>8</sup>**

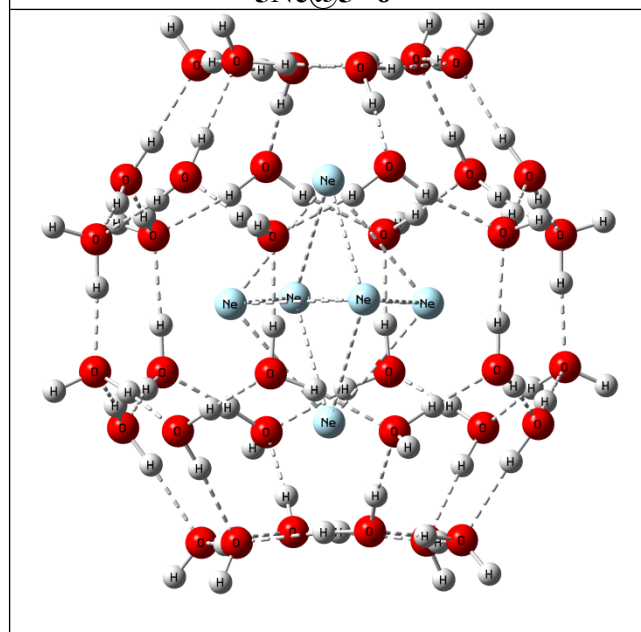

**6Ne@5<sup>12</sup>6<sup>8</sup>**

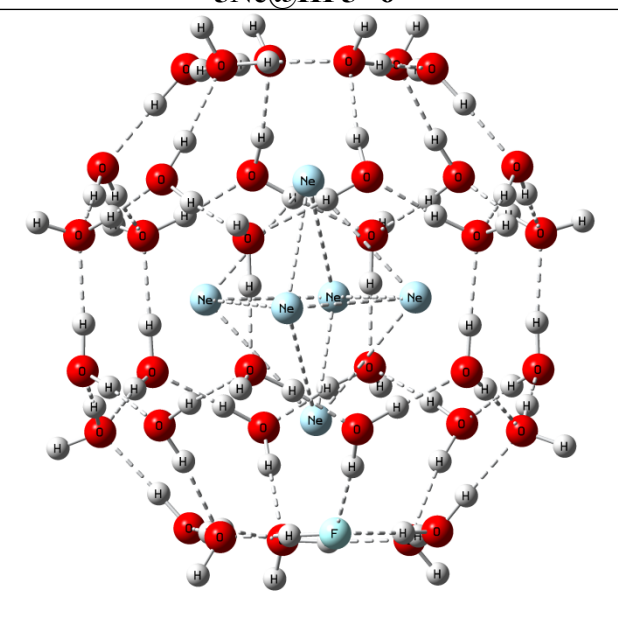

**6Ne@HF5<sup>12</sup>6<sup>8</sup>**

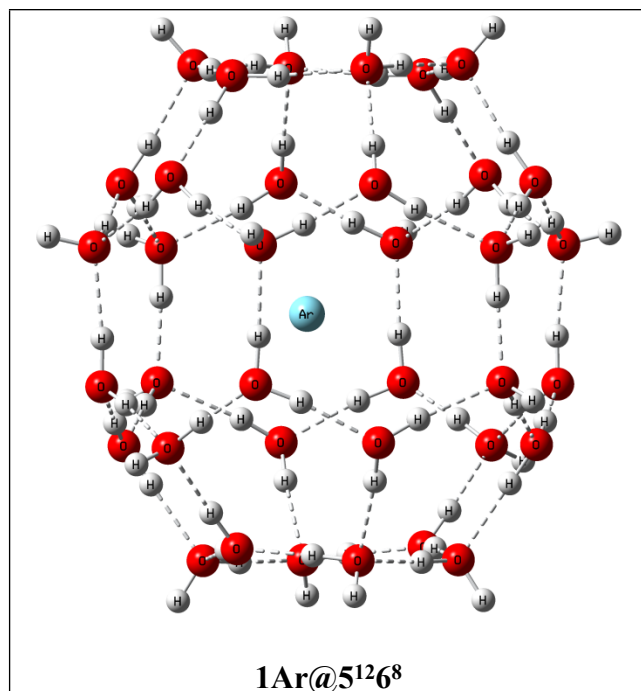

**1Ar@5<sup>12</sup>6<sup>8</sup>**

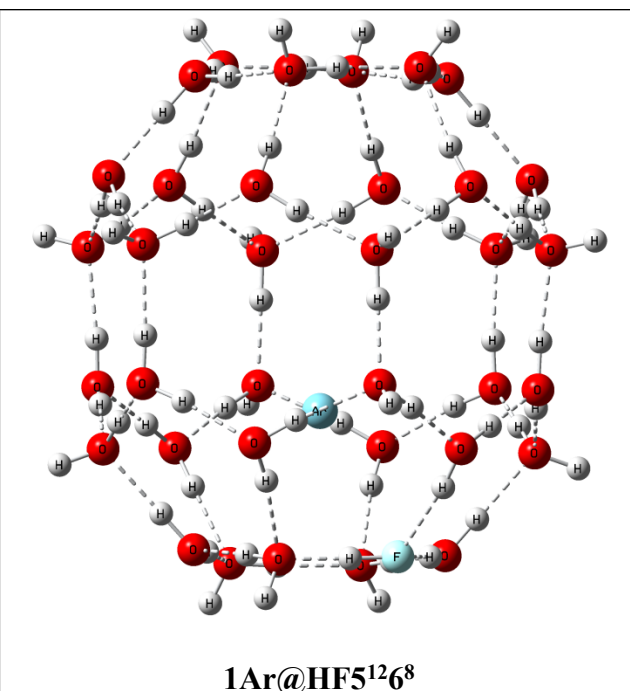

**1Ar@HF5<sup>12</sup>6<sup>8</sup>**

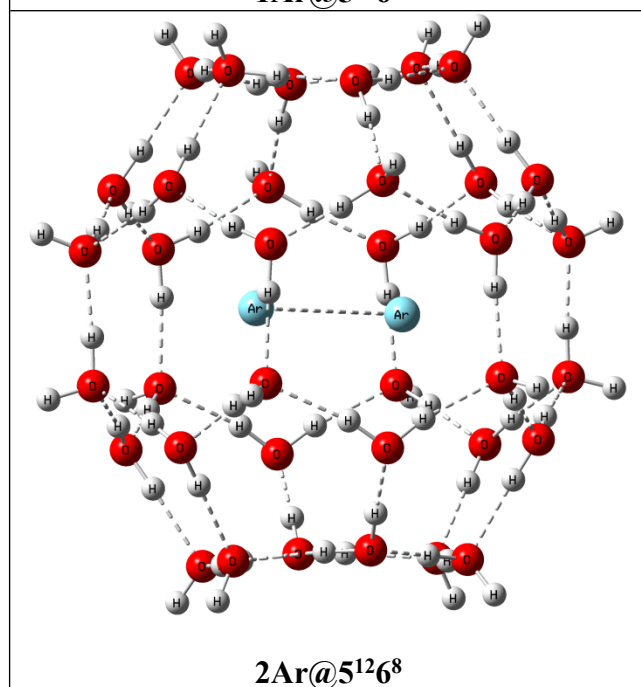

**2Ar@5<sup>12</sup>6<sup>8</sup>**

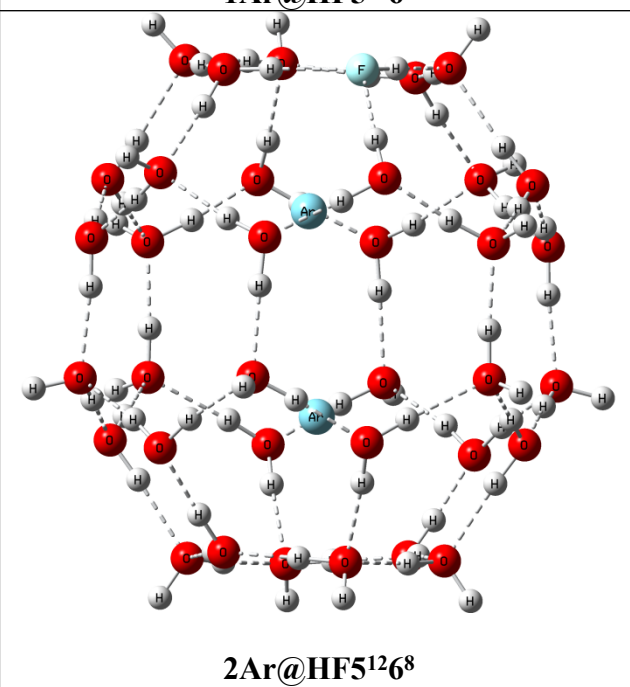

**2Ar@HF5<sup>12</sup>6<sup>8</sup>**



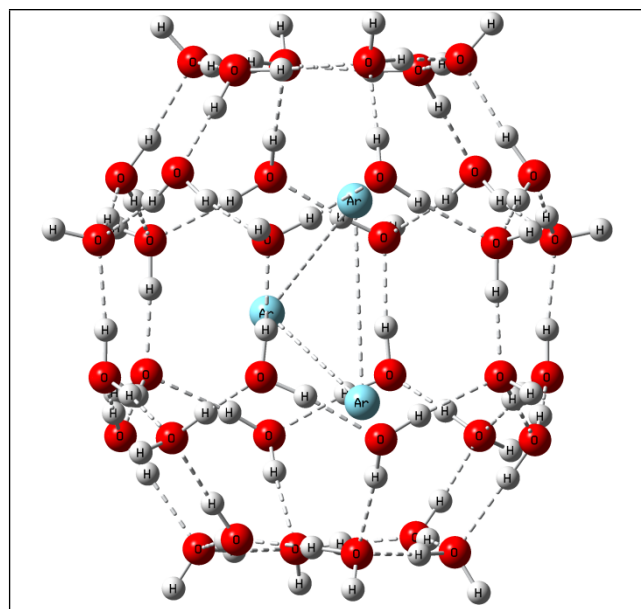

**3Ar@5<sup>126</sup>8**

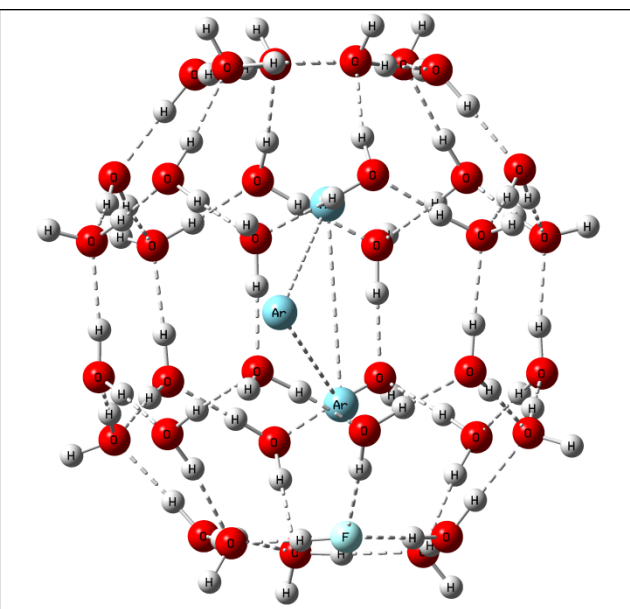

**3Ar@HF5<sup>126</sup>8**

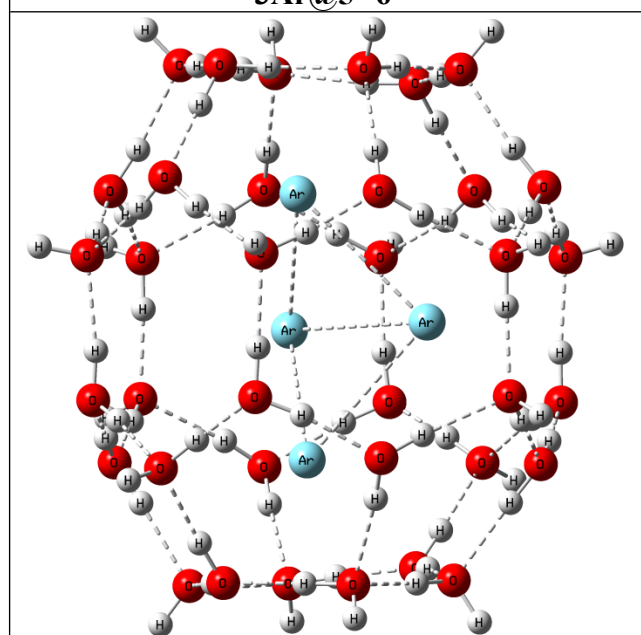

**4Ar@5<sup>126</sup>8**

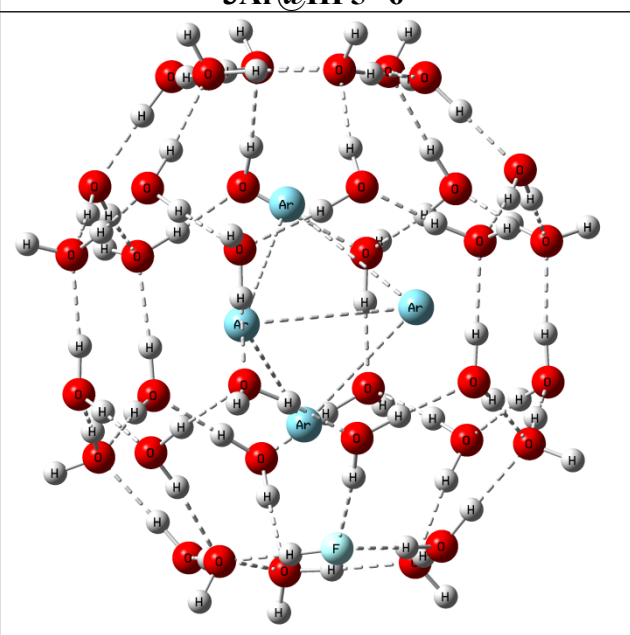

**4Ar@HF5<sup>126</sup>8**

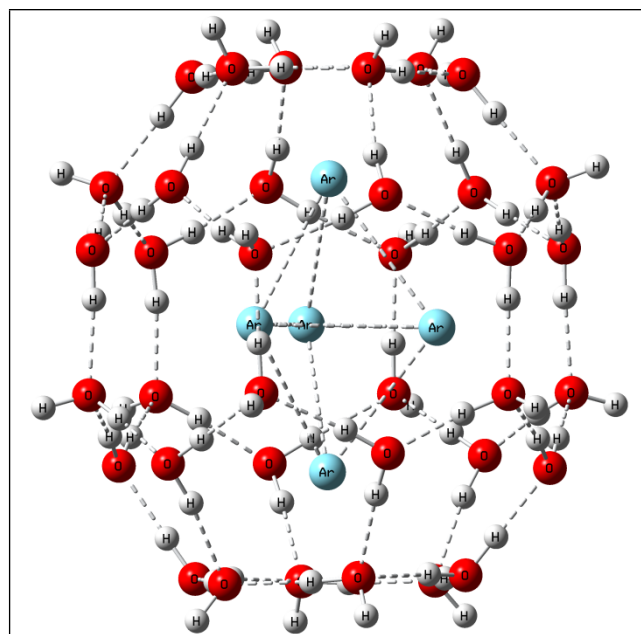

**5Ar@5<sup>126</sup>8**

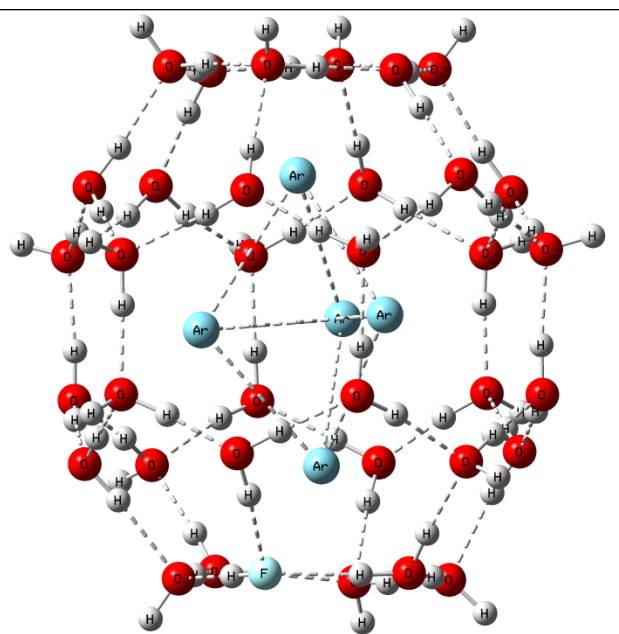

**5Ar@HF5<sup>126</sup>8**

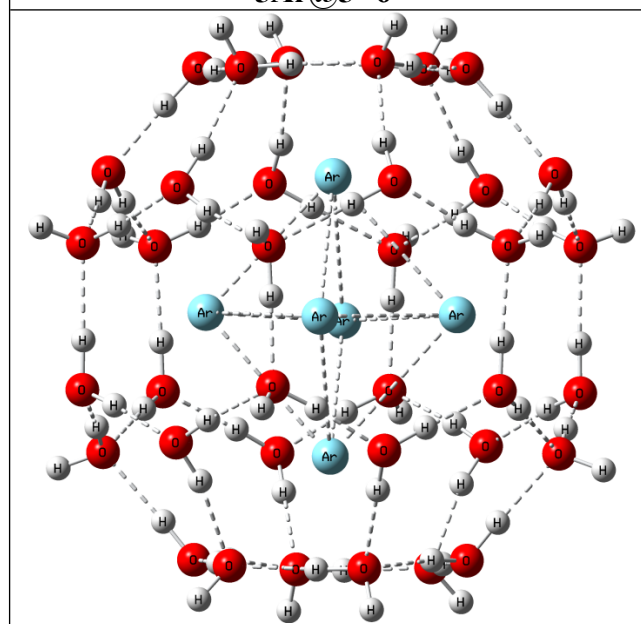

**6Ar@5<sup>126</sup>8**

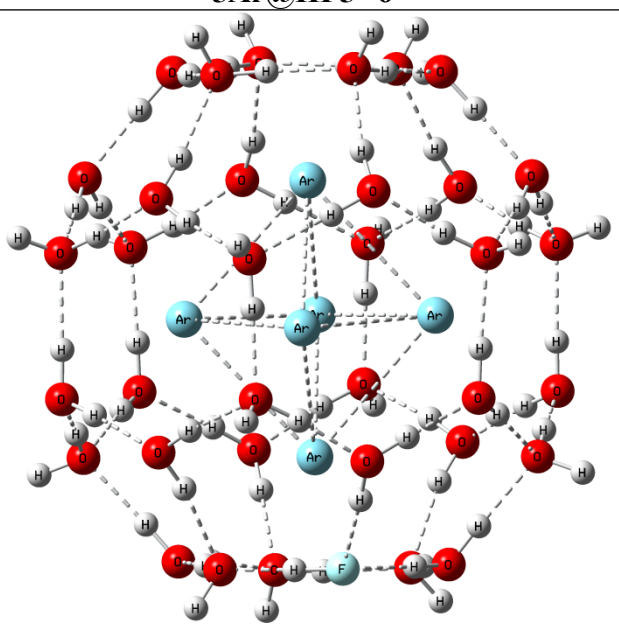

**6Ar@HF5<sup>126</sup>8**
